# Supplementary material for: Hydralazine induces stress resistance and extends C. elegans lifespan by activating the NRF2/SKN-1 signalling pathway
Source: PubMed Central journal article supplement (PMC5738364; doi:10.1038/s41467-017-02394-3), 2017-12-20
Supplement: 41467_2017_2394_MOESM1_ESM.pdf [file 41467_2017_2394_MOESM1_ESM.pdf]

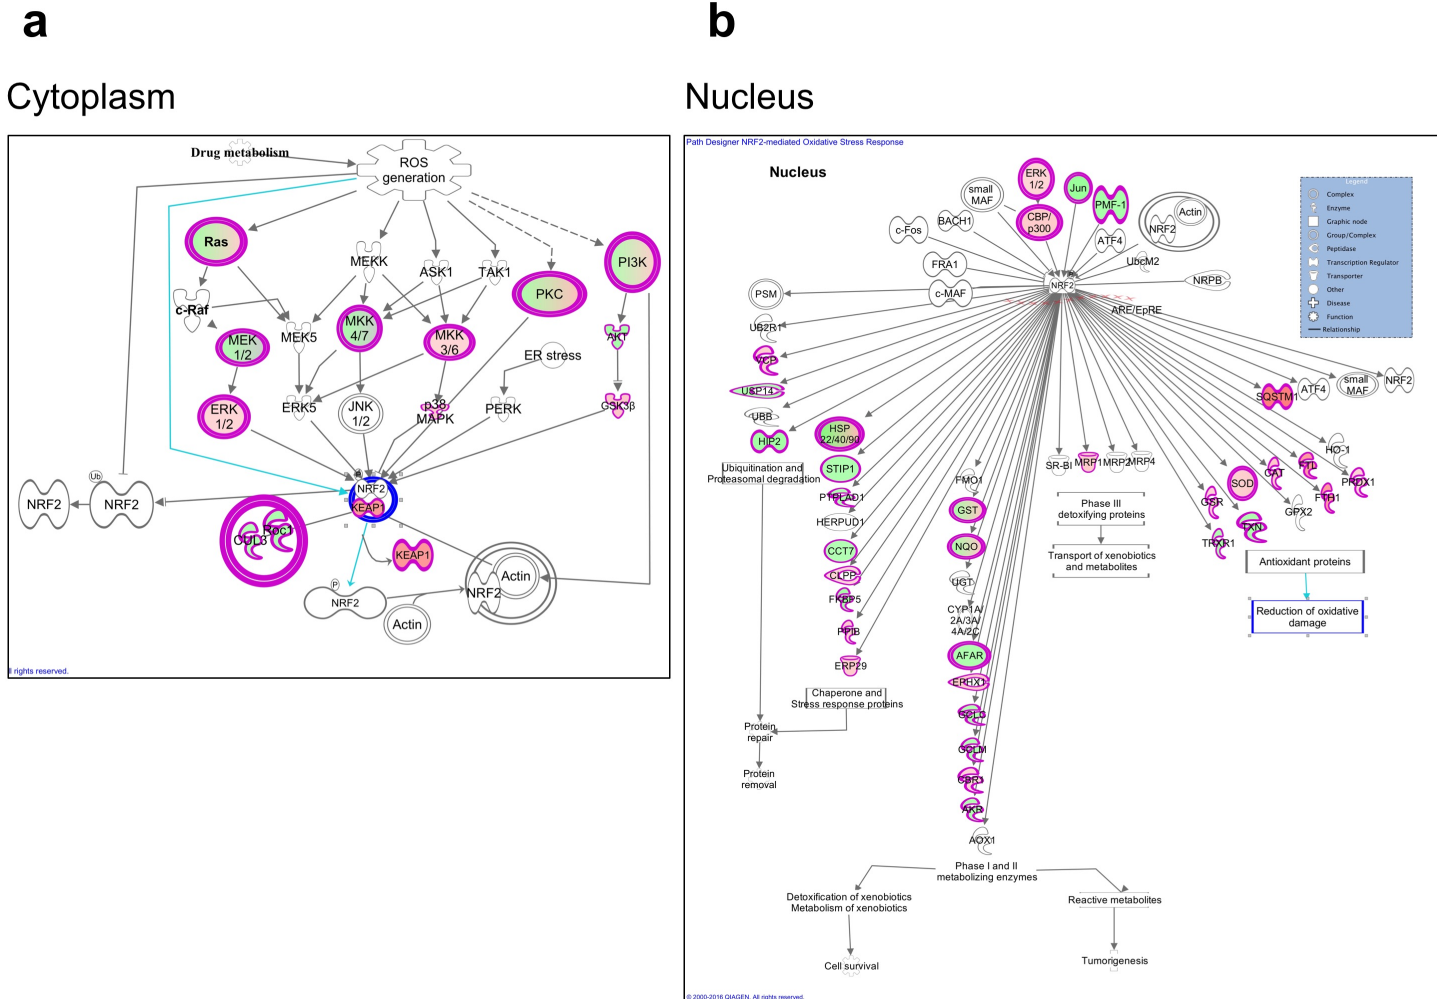

**Supplementary Figure 1. NRF2 pathway activation identified with IPA using protein ratios determined using shotgun analysis of SH-SY5Y cells grown in SILAC media and treated with hydralazine. (a) NRF2 pathway activation in the cytoplasm. (b) NRF2 pathway activation in the nucleus. For shape and color codes follow this link. ([http://ingenuity.force.com/ipa/articles/Feature\\_Description/Legend](http://ingenuity.force.com/ipa/articles/Feature_Description/Legend)).**

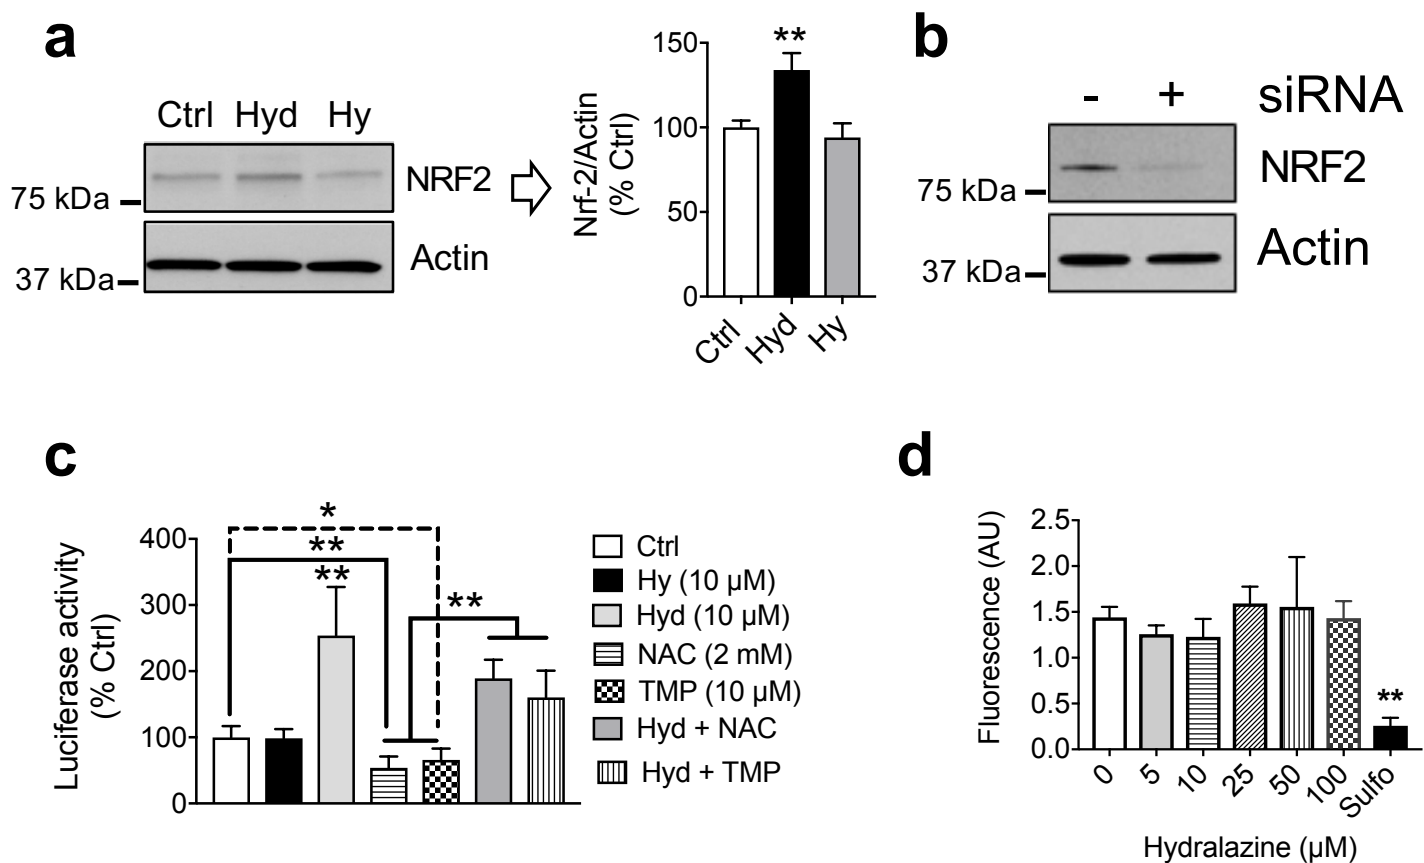

### Supplementary Figure 2. Validating NRF2 activation and exploring its mechanism of action

(a) Hydrazine used as negative control for hydralazine did not increase NRF2 protein measured by Western blot analysis. Both hydralazine and hydrazine were used at 5 μM concentration. (b) Confirming the specificity of the antibody used for NRF2 Western blot analysis using NRF2 knockdown SH-SY5Y cells. (c) The ARE-driven luciferase activity was decreased in SH-SY5Y cells treated with antioxidant compounds N-acetyl cysteine (NAC, 2 mM) and Tempol (TMP, 10 μM) and increased when cells were treated with the antioxidant compounds and hydralazine (10 μM) indicating that hydralazine-mediated NRF2 activation was ROS independent, \*p < 0.05 and \*\*p < 0.01, student t-test, n=3, mean ± SD. (d) KEAP1-NRF2 Inhibitor Screening Assay showed that hydralazine dose not directly interrupt the interaction between NRF2 and KEAP1. \*\*p < 0.01 student t-test, n=3, mean ± SD. Sulforaphane (5 μM) was used as a positive control (inhibitor), \*\*p < 0.01, student t-test, n=3, mean ± SD.

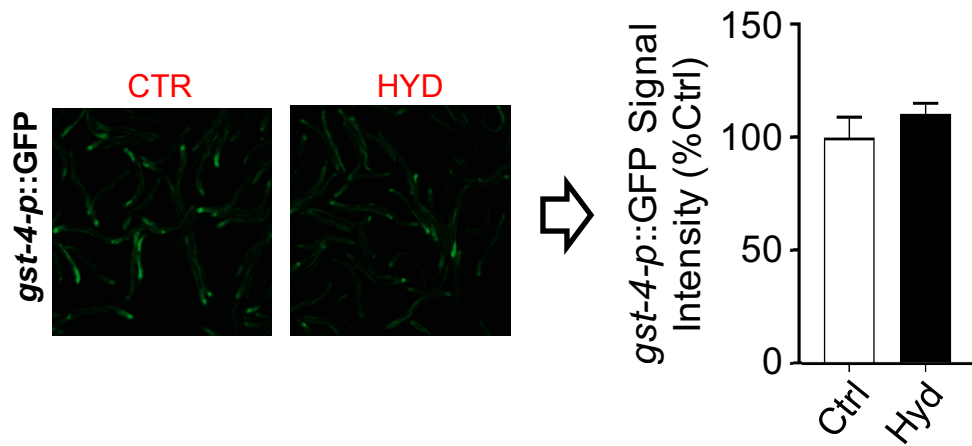

**Supplementary Figure 3. Testing a downstream target of SKN-1 in a mutant strain lacking functional SKN-1C.** Hydralazine treatment did not induce *gst-4p::GFP* expression in transgenic worms (*dvls19*) lacking a functional SKN-1 isoform C in their intestine in a mutant background *skn-1(zu67)*.  $p > 0.05$  student t-test,  $n = 50$  two independent trials, mean  $\pm$  SD.

**a**

Cytoplasm

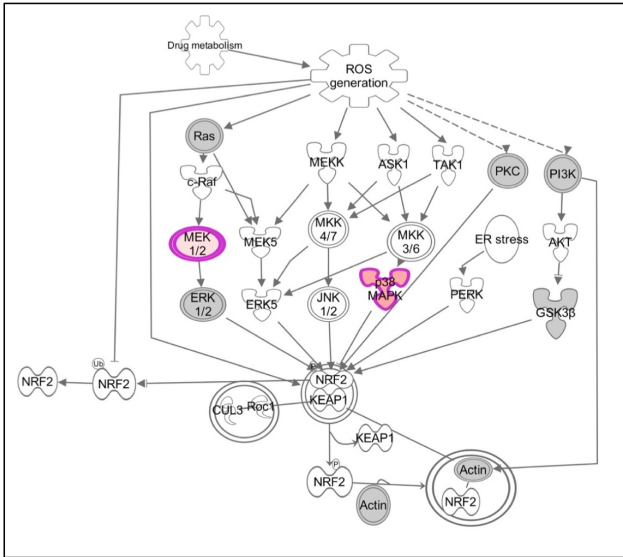**b**

Nucleus

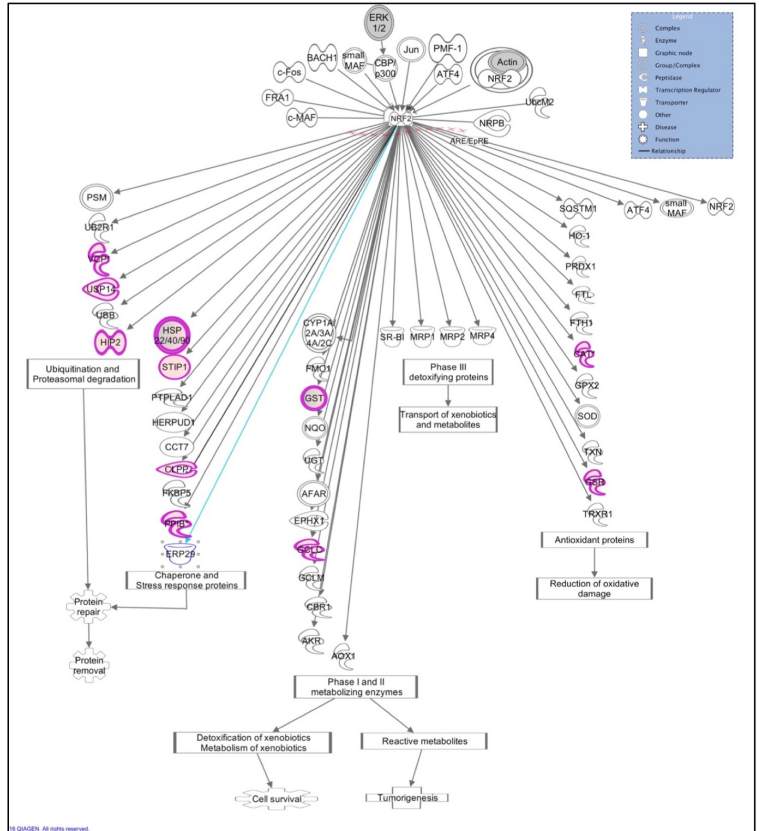

**Supplementary Figure 4. SKN-1/NRF2 pathway activation identified with IPA using protein ratios determined using label free analysis of wild type *C. elegans* treated with hydralazine or vehicle. (a) SKN-1/NRF2 pathway activation in the cytoplasm. (b) SKN-1/NRF2 pathway activation in the nucleus. For shape and color codes follow this link ([http://ingenuity.force.com/ipa/articles/Feature\\_Description/Legend](http://ingenuity.force.com/ipa/articles/Feature_Description/Legend)).**

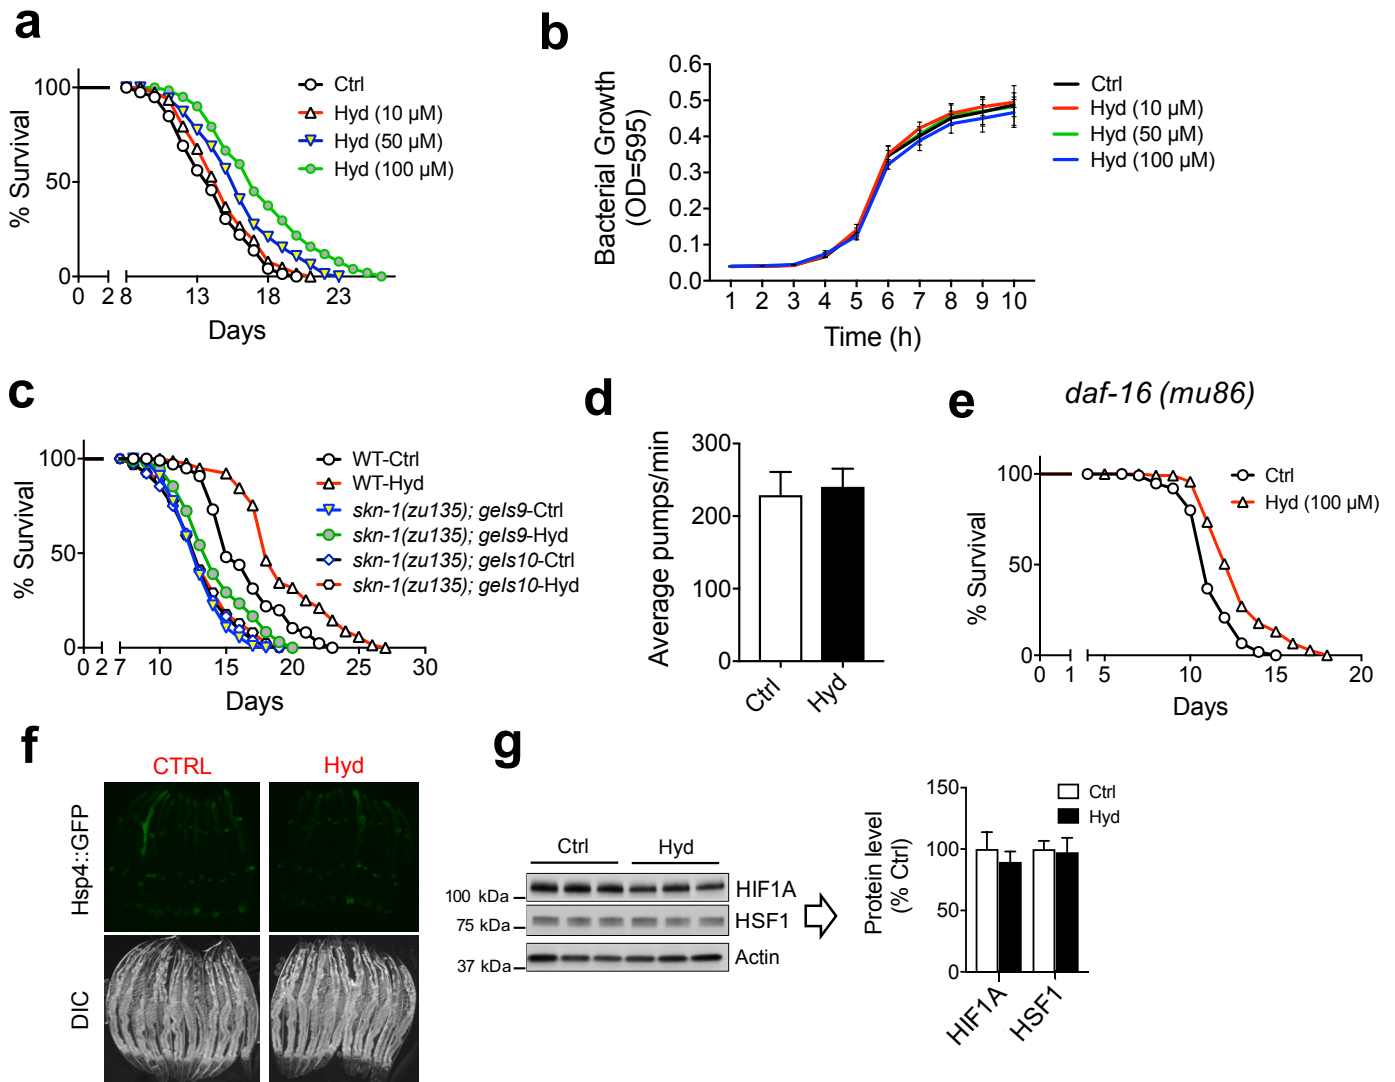

**Supplementary Figure 5. Hydralazine extends lifespan in *C. elegans*. For all lifespan statistics, see Supplementary Table 3. (a)** Hydralazine treatment increased *C. elegans* lifespan in a dose-dependent manner. **(b)** HB101 bacteria in liquid LB treated with different concentrations of hydralazine did not show growth retardation, two-tailed student t-test,  $n=6$ . **(c)** Expression of *skn-1* isoforms *b* by transgene *gels9* partially restores longevity benefits of hydralazine (100  $\mu\text{M}$ ) while expression of isoform *c* in transgenic *gels10* did not, signifying the role of *skn-1* isoforms *b* in hydralazine-mediated lifespan extension. **(d)** Pharyngeal pumping rate of wild type young (day 4) *C. elegans* treated with 100  $\mu\text{M}$  hydralazine was not significantly altered, ruling out the possibility of hydralazine interfering with food uptake mimicking calorie restriction, two-tailed student t-test,  $n=32$ , mean  $\pm$  SD. **(e)** Hydralazine mediated lifespan extension was not significantly attenuated in mutant *daf-16* *C. elegans* ruling out the possibility of *daf-2* insulin/IGF-1 signaling pathway involvement in pro-longevity effects of hydralazine. **(f)** Fluorescence microscopic images tracing *hsp-4p::GFP* protein, a reporter of UPR<sup>ER</sup> activation, indicated that hydralazine does not induce ER stress. **(g)** Two other important regulators of aging paradigm, HIF1A and HSF1, did not change in SH-SY5Y cells treated with 10  $\mu\text{M}$  hydralazine. Two-tailed student t-test,  $n=3$ , mean  $\pm$  SD.

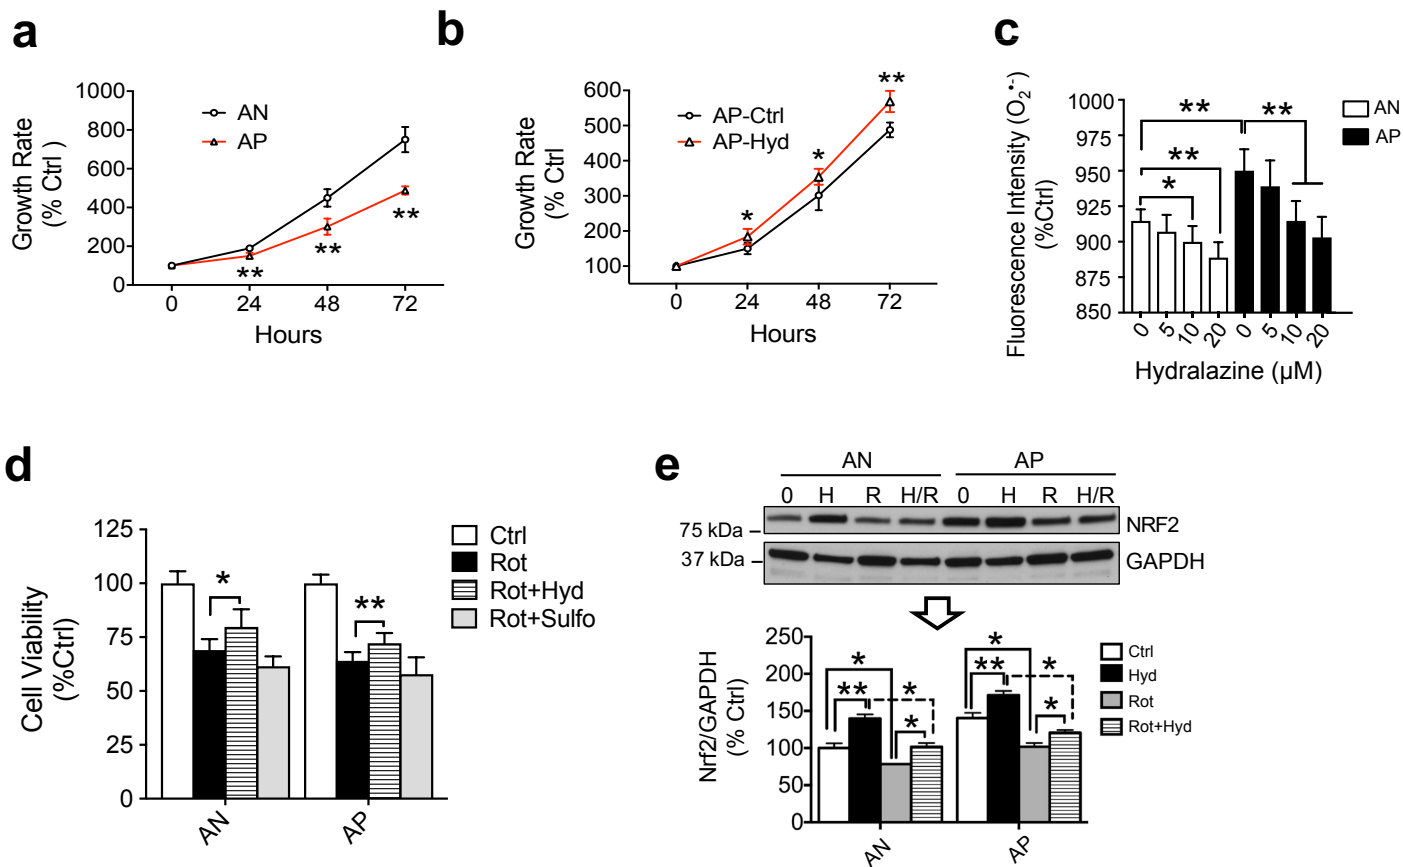

**Supplementary Figure 6. Hydralazine protects tauopathy model cells from exogenous and endogenous stressors presenting a therapeutic potential for the treatments of neurodegenerative diseases. (a)** Cell growth analysis showed a slower growth rate for aggregate-positive (AP) cells compared to control aggregate-negative (AN) cells. \*\* $p < 0.01$  student t-test,  $n = 8$ , mean  $\pm$  SD. **(b)** Hydralazine treatment (5  $\mu\text{M}$ ) improves the growth rate of aggregate-positive cells. \* $p < 0.05$  and \*\* $p < 0.01$ , student t-test,  $n = 8$ , mean  $\pm$  SD. **(c)** Superoxide fluorescence signal intensity was higher in aggregate-positive cells compared to the control cells and decreases with hydralazine treatment in a dose dependent-manner in both cell models. \* $p < 0.05$  and \*\* $p < 0.01$ , student t-test,  $n = 6$ , mean  $\pm$  SD. **(d)** Hydralazine (10  $\mu\text{M}$ ) improved the viability of both aggregate-positive and negative cells that are under rotenone stress (1  $\mu\text{M}$ ). Sulforaphane (5  $\mu\text{M}$ ) was used as positive control. \*\* $p < 0.01$ , student t-test,  $n = 6$ , mean  $\pm$  SD. **(e)** Hydralazine (10  $\mu\text{M}$ ) reversed rotenone-mediated (1  $\mu\text{M}$ ) reduction in NRF2 protein signal intensity measured by Western blot. \* $p < 0.05$  and \*\* $p < 0.01$ , student t-test,  $n = 3$ , mean  $\pm$  SD.

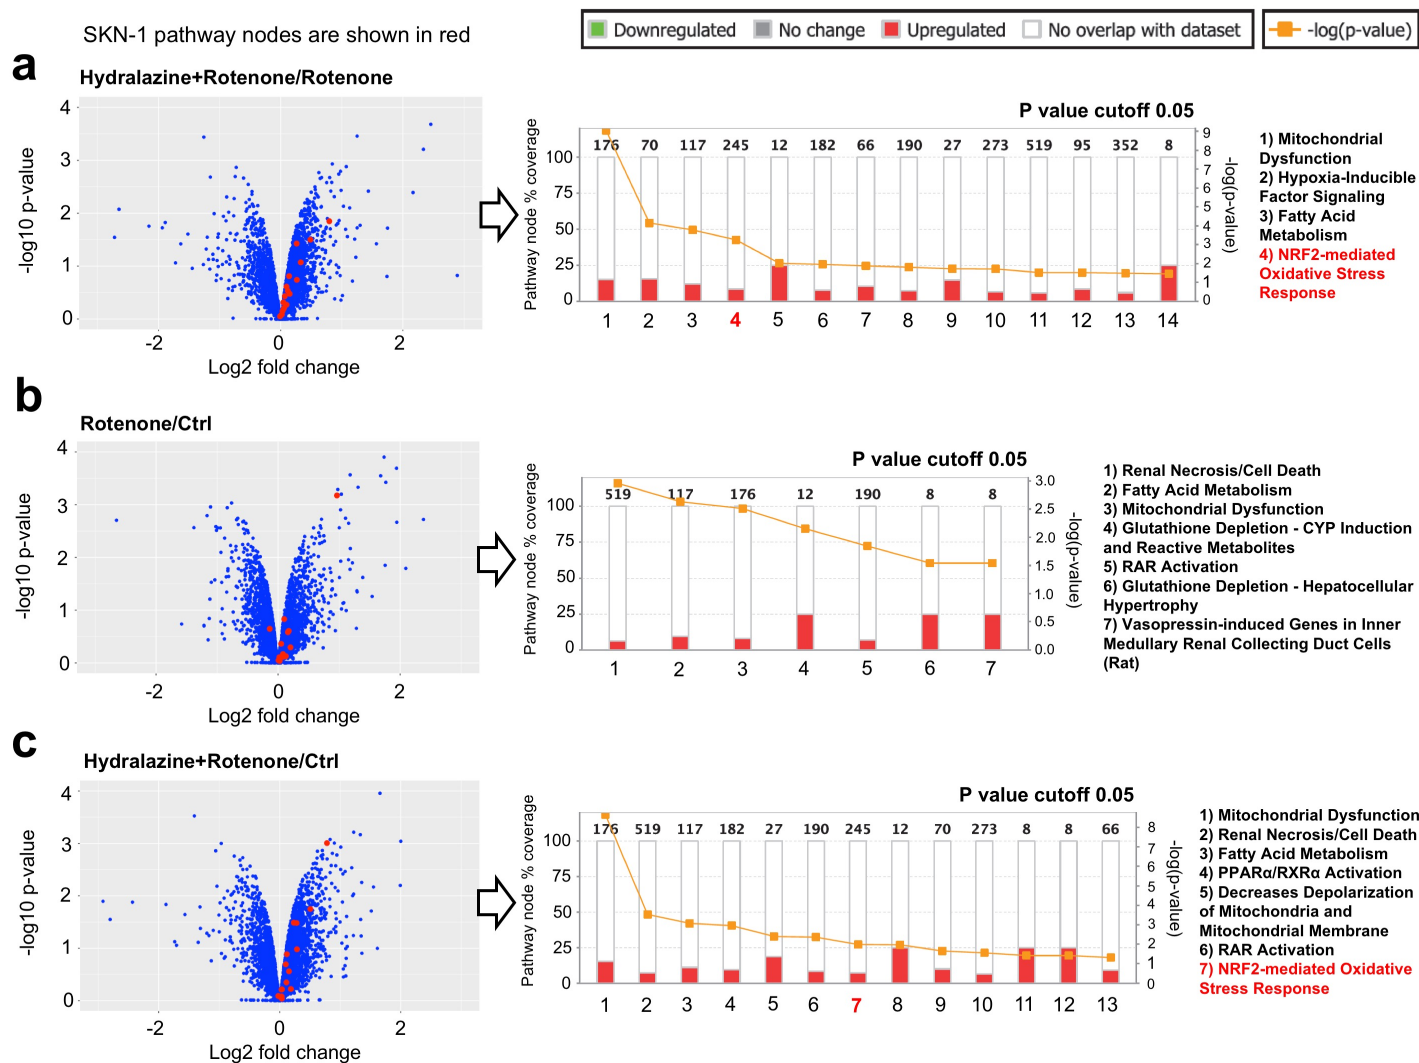

**Supplementary Figure 7. Hydralazine activates SKN-1/NRF2 pathway in worms treated with rotenone.**

(a) Volcano plot showing the ratio (hydralazine+rotenone/rotenone) distribution of proteins quantified by label-free mass spectrometry. Proteins ratios obtained by label free mass spectrometry were uploaded for IPA analysis. SKN-1/NRF2 was number four in the top five activated stress response pathways (p-value cutoff of 0.05, right-tailed Fisher Exact Test.). (b) Volcano plot showing the ratio (rotenone/Ctrl) distribution of proteins quantified by label-free mass spectrometry. The results of IPA analysis for worms treated with rotenone compared to control. SKN-1/NRF2 was not among activated pathways (p-value cutoff of 0.05, right-tailed Fisher Exact Test.). (c) Volcano plot showing the hydralazine+rotenone/Ctrl ratio distribution of proteins quantified by label-free mass spectrometry. SKN-1/NRF2 pathway was among activated pathways when worms treated with rotenone and hydralazine were compared to control worms (p-value cutoff of 0.05, right-tailed Fisher Exact Test.). We showed our results pathways based on the p-value simply because this is a statistical figure of-merit. From a statistical point of view, a p-value means that the probability of getting the results obtained with a set null hypothesis (in our case was whether the results are statistically significantly different or not) is true. This is an indication for reproducibility. Further, these results were confirmed with the volcano plot based on Tukey Honestly Significant difference Test.

Supplementary Figure 8:

Figure 3a.

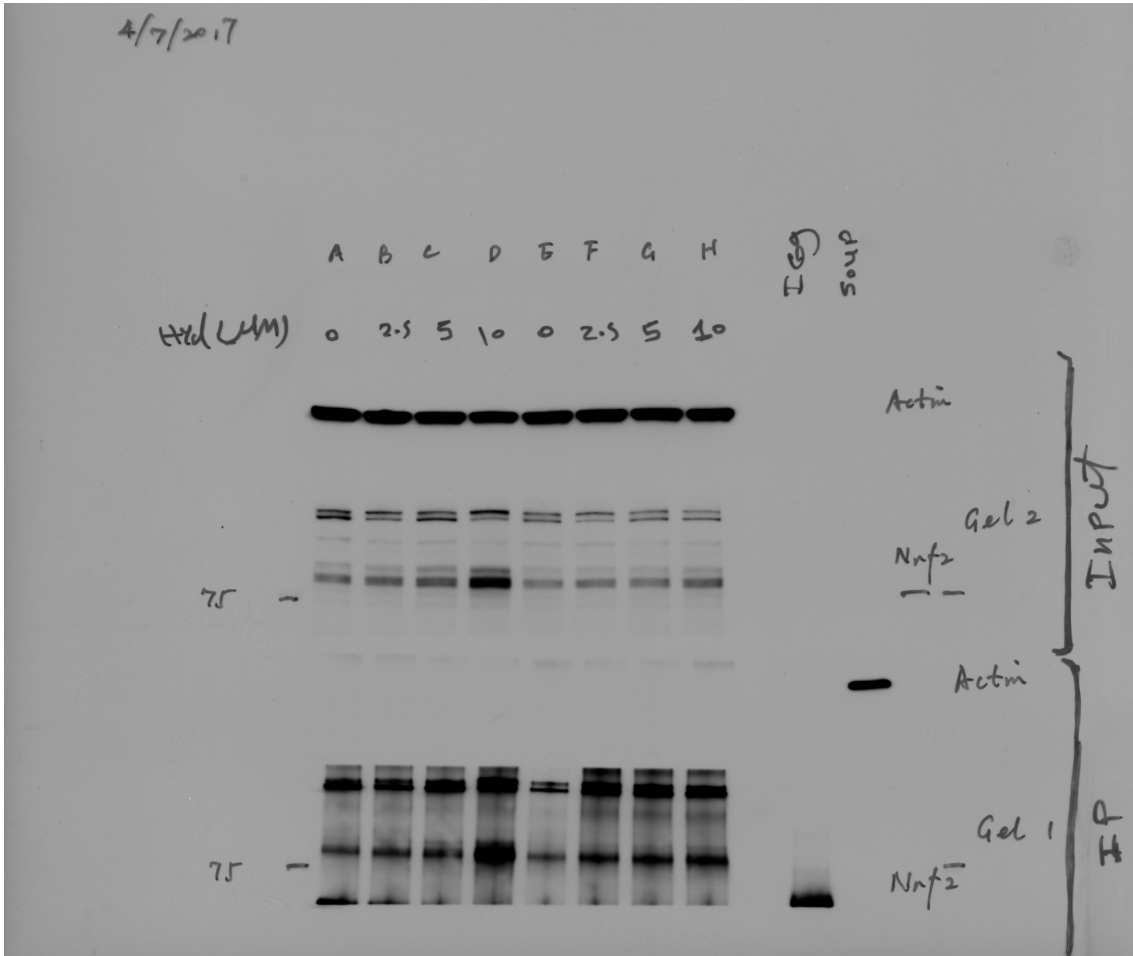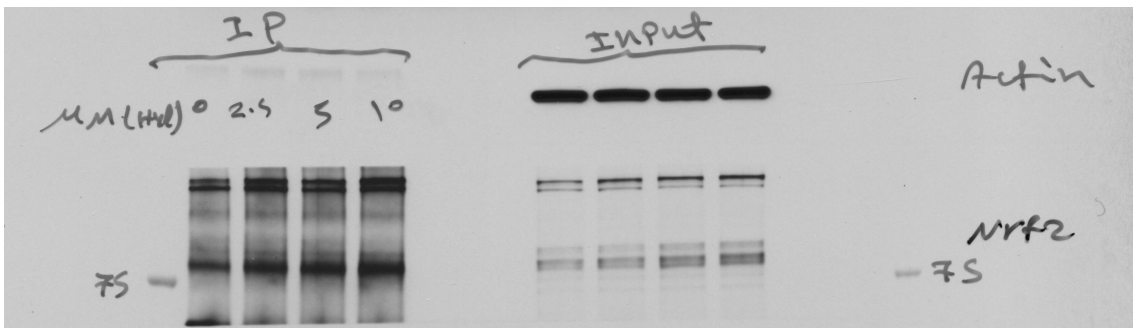



**Figure 3c.**

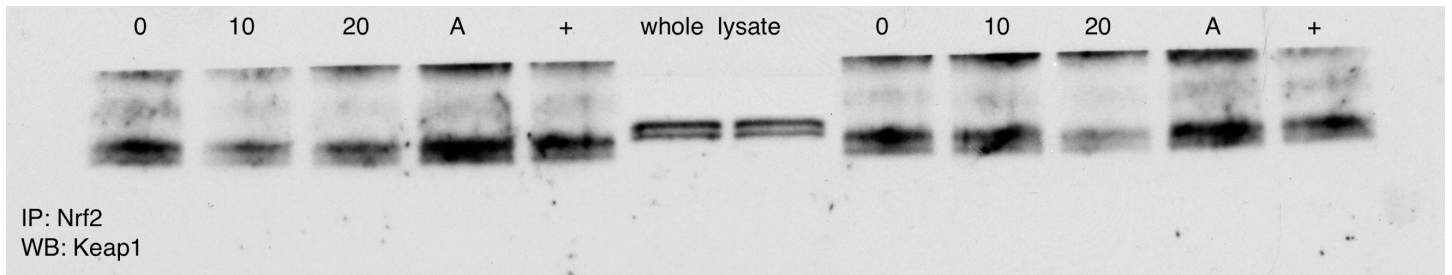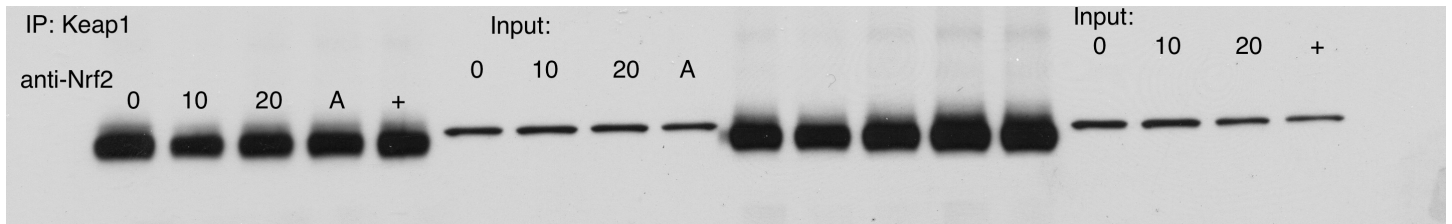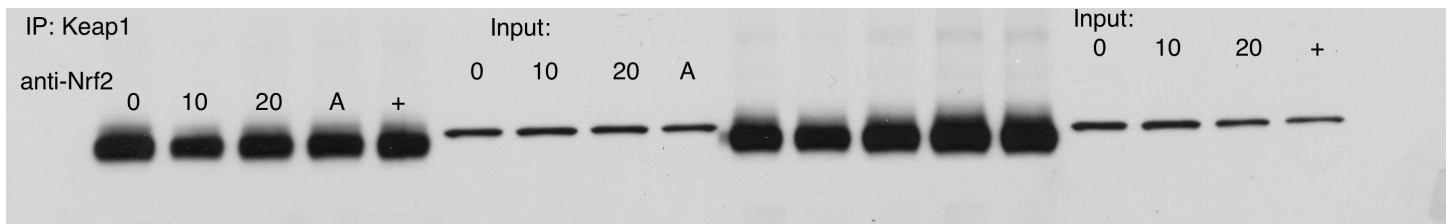



Figure 3e.

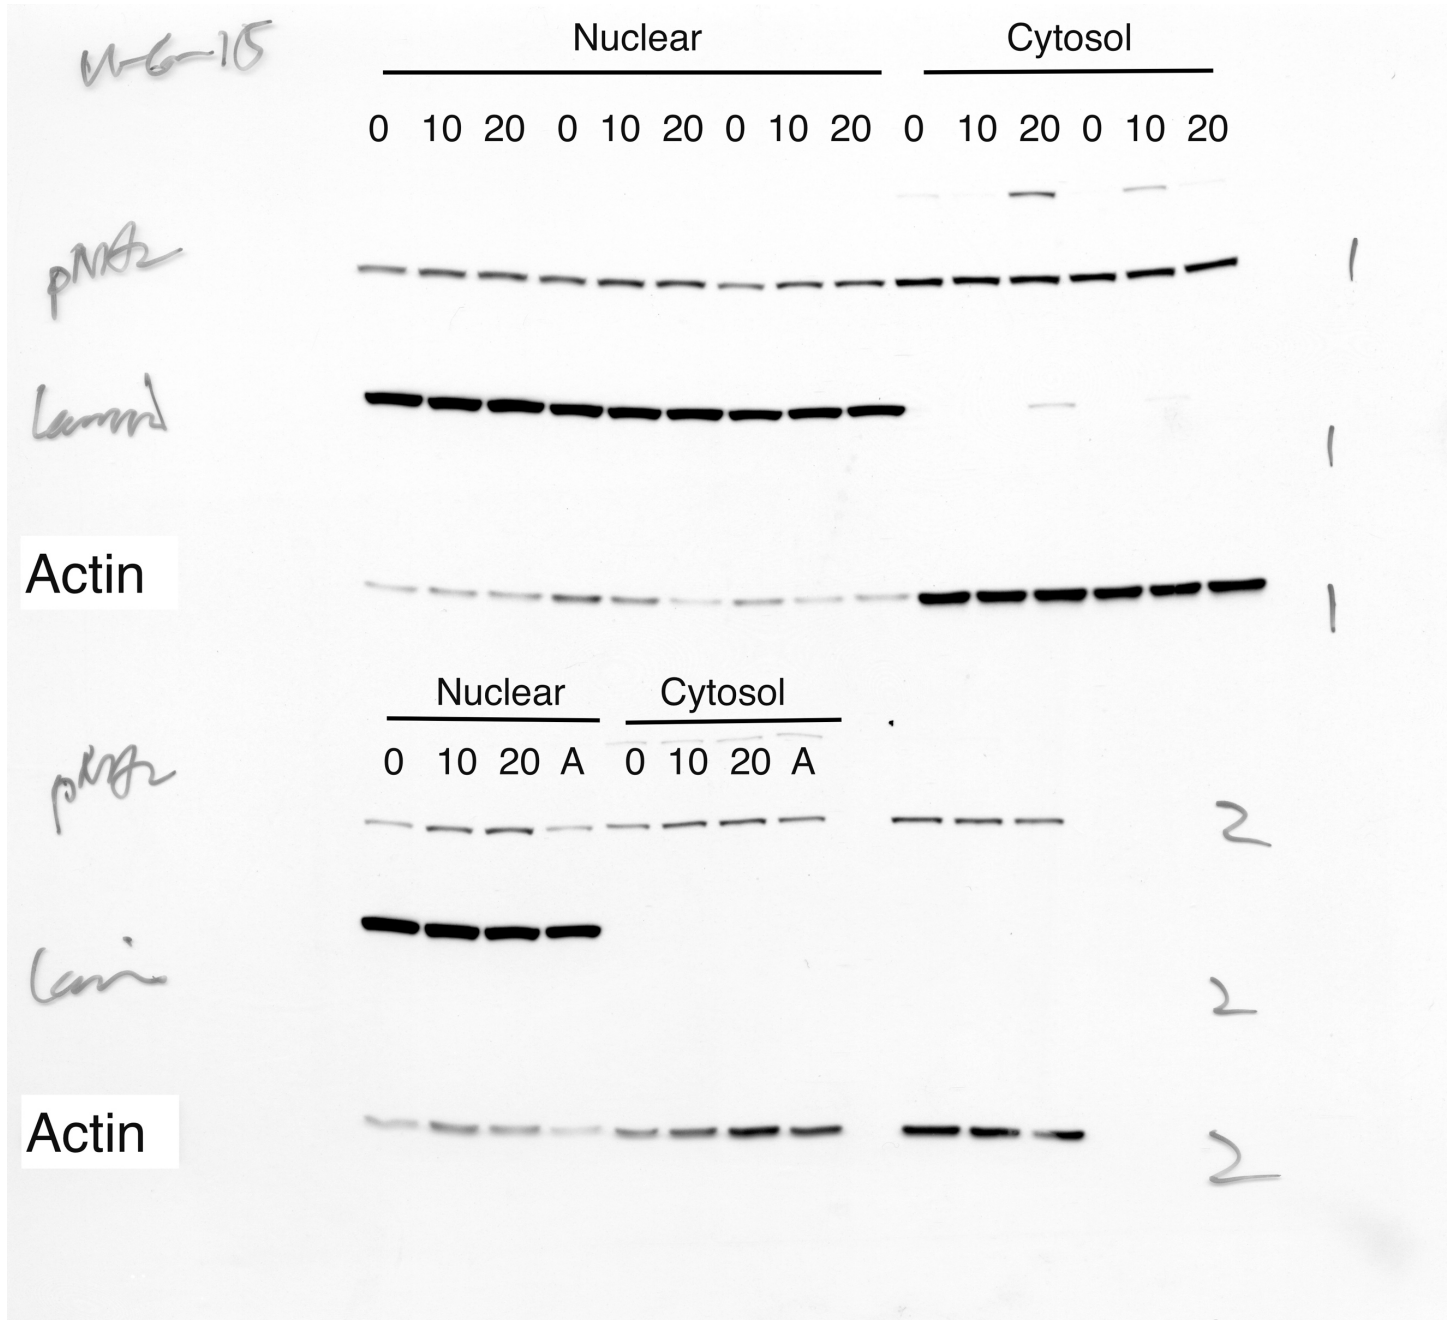

Figure 3f.

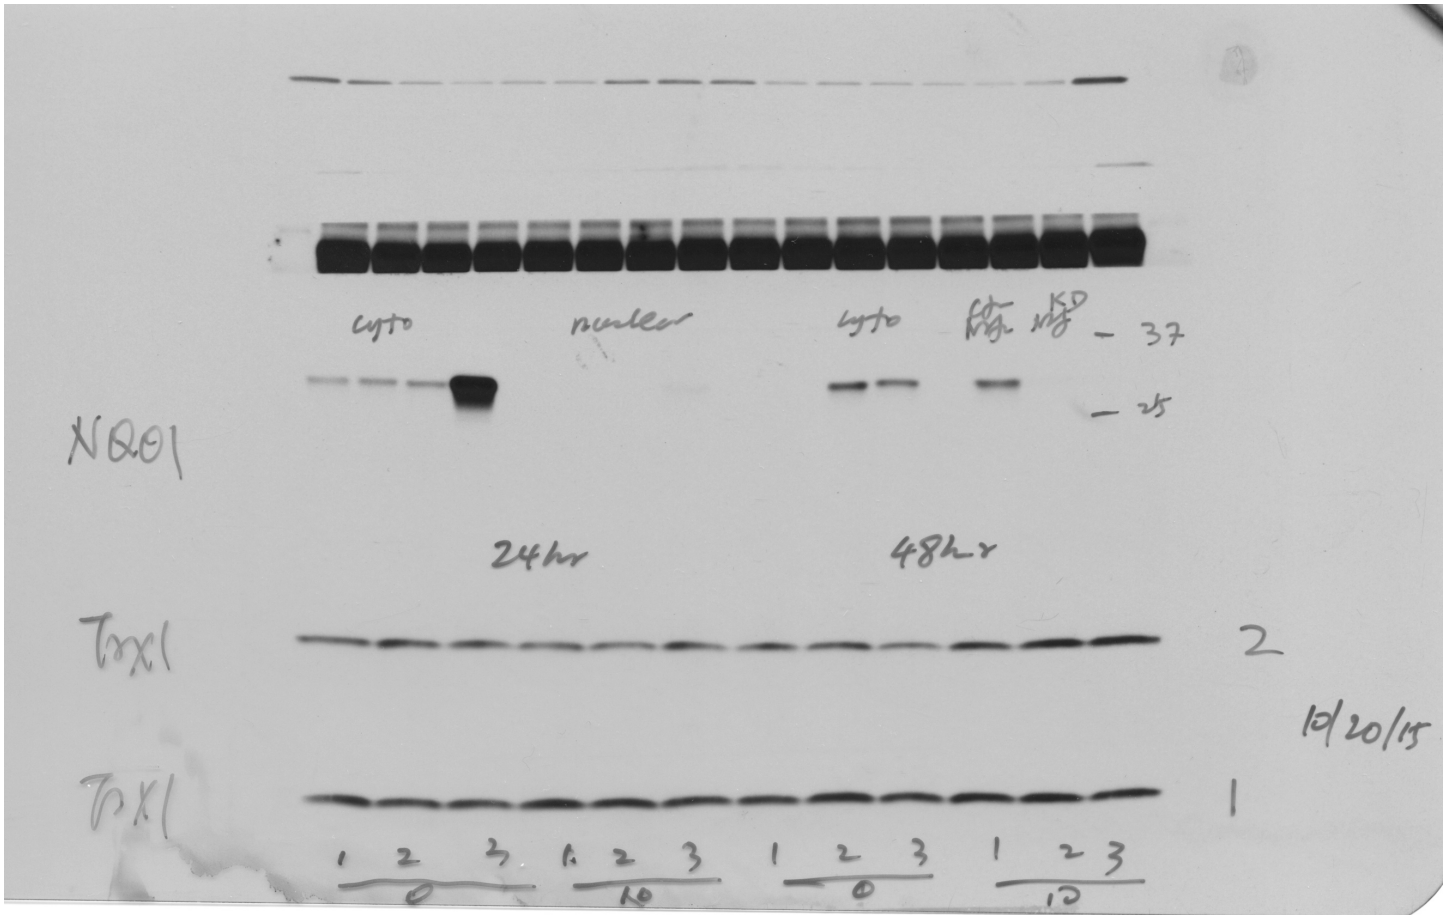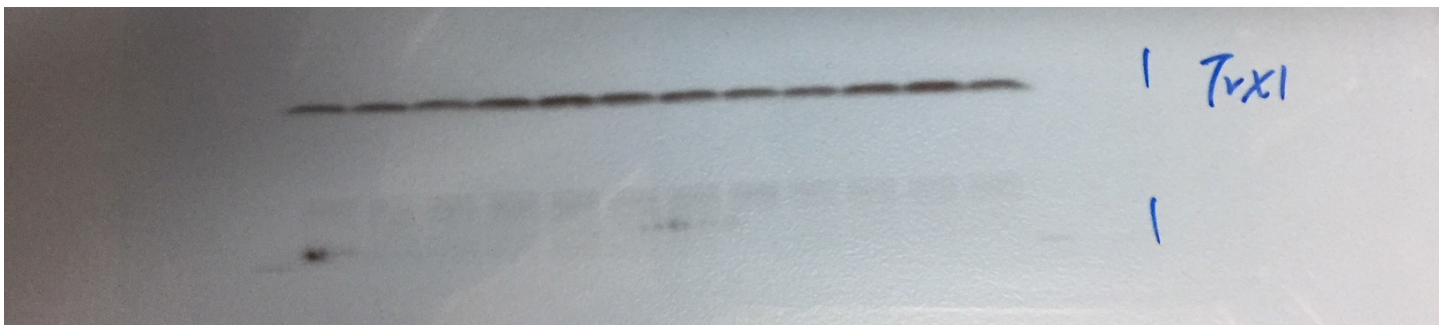

Figure 3i.

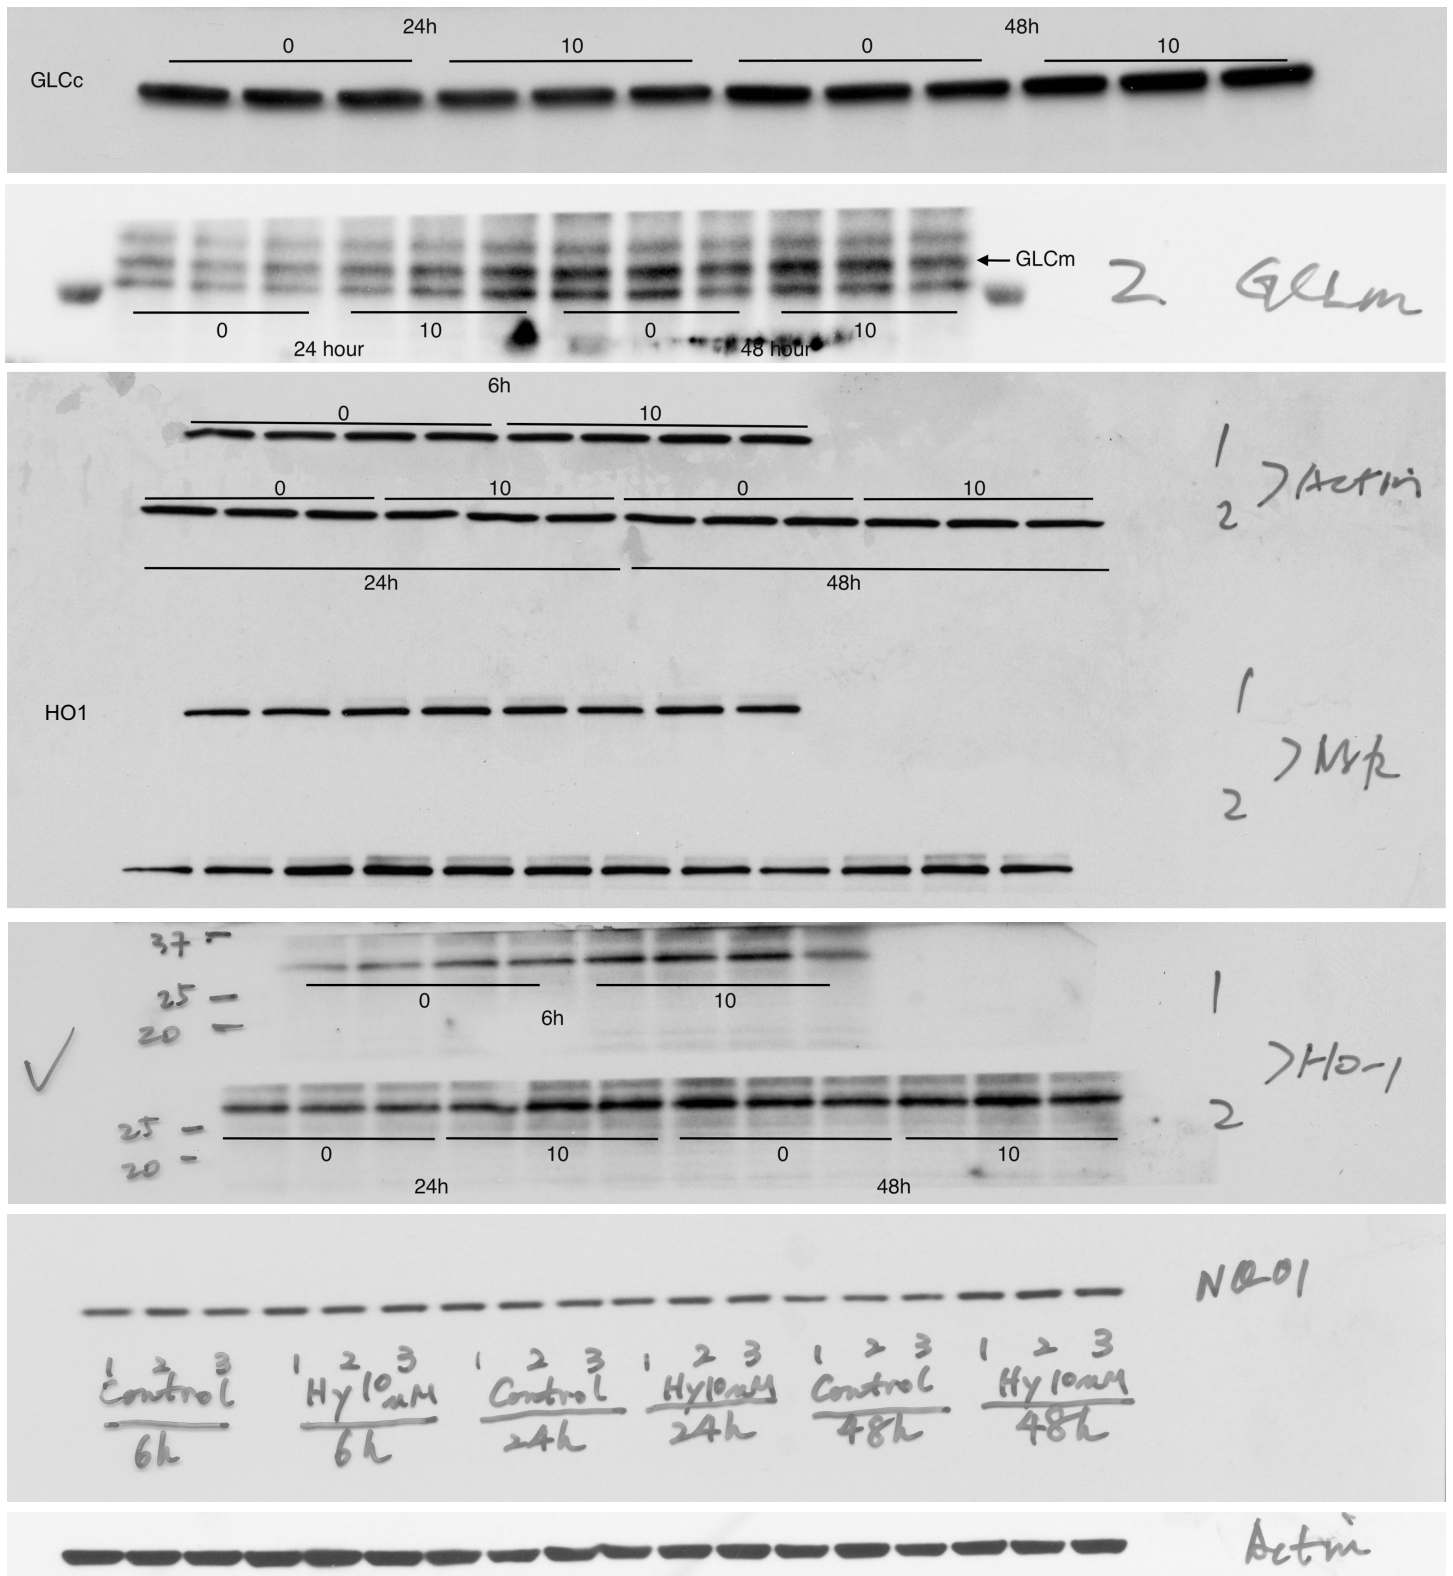

**Supplementary Table 1.** Sequences of primers used for quantitative real-time PCR analysis of NRF2 pathway gene expression.

| Gene name      | Forward (5'-3')                 | Reverse (5'-3')                | Annealing temperature (°C) |
|----------------|---------------------------------|--------------------------------|----------------------------|
| <i>NRF2</i>    | <b>AACCACCCTGAAAGCACAGC</b>     | <b>TGAAATGCCGGAGTCAGAATC</b>   | 60                         |
| <i>NQO1</i>    | <b>CGCAGACCTTGTGATATTCCAG</b>   | <b>CGTTTCTTCCATCCTTCCAGG</b>   | 60                         |
| <i>HMOX1</i>   | <b>TCTCTTGGCTGGCTTCCTTAC</b>    | <b>GCTTTTGGAGGTTTGAGACA</b>    | 60                         |
| <i>GST4</i>    | <b>GAGAACCCTGATTGACATGTA</b>    | <b>GCTGATTACCAACAAGAAAGC</b>   | 60                         |
| <i>GSTP1</i>   | <b>TCCCTCATCTACACCAACTATGAG</b> | <b>GGTCTTGCCTCCCTGGTT</b>      | 60                         |
| <i>GCLC</i>    | <b>ATGGAGGTGCAATTAACAGAC</b>    | <b>ACTGCATTGCCACCTTTGCA</b>    | 60                         |
| <i>GCLM</i>    | <b>GCTGTATCAGTGGGCACAG</b>      | <b>CGCTTGAATGTCAGGAATGC</b>    | 60                         |
| <i>β-actin</i> | <b>GCCGGGACCTGACTGACTAC</b>     | <b>TTCTCCTTAATGTCACGCACGAT</b> | 60                         |

**Supplementary Table 2.** Statistical data for lifespan studies.

| Corresponding Figure                    | Strain, treatment                     | Median Lifespan (days) |           | % difference | P-values | N (number of animals) |           |
|-----------------------------------------|---------------------------------------|------------------------|-----------|--------------|----------|-----------------------|-----------|
|                                         |                                       | Vehicle                | Treatment |              |          | Vehicle               | Treatment |
| Fig. 5a and Suppl. Fig 5a               | N2, 10 $\mu$ M Hyd                    | 14                     | 15        | +07.14       | 0.3494   | 105                   | 108       |
|                                         | N2, 50 $\mu$ M Hyd                    | 13                     | 15        | +15.38       | <0.0001  | 86                    | 98        |
|                                         |                                       | 14                     | 16        | +14.28       | <0.0001  | 105                   | 112       |
|                                         | N2, 100 $\mu$ M Hyd                   | 14                     | 17        | +21.50       | <0.0001  | 105                   | 109       |
|                                         |                                       | 13                     | 16        | +23.07       | <0.0001  | 86                    | 88        |
| 15                                      |                                       | 18                     | +20.00    | <0.0001      | 75       | 84                    |           |
| 14                                      |                                       | 18                     | +28.60    | <0.0001      | 108      | 112                   |           |
| Fig. 5b                                 | N2-heat-inactivated 100 $\mu$ M Hyd   | 18                     | 22        | +22.22       | <0.0001  | 117                   | 120       |
|                                         |                                       | 17                     | 21        | +23.52       | <0.0001  | 102                   | 95        |
|                                         | N2- 100 $\mu$ M Hyd pretreated HB101  | 15                     | 15        | -            | 0.2696   | 99                    | 90        |
| Fig. 5c                                 | N2,100 $\mu$ M Hyd                    | 15                     | 18        | +20.00       | <0.0001  | 130                   | 112       |
|                                         |                                       | 14                     | 16        | +14.28       | <0.0001  | 117                   | 101       |
|                                         | N2,100 $\mu$ M Curcumin               | 15                     | 16        | +06.25       | 0.0815   | 130                   | 122       |
| N2,20 mM Metformin                      | 15                                    | 17                     | +13.30    | <0.0006      | 130      | 99                    |           |
|                                         | 14                                    | 16                     | +14.28    | <0.0001      | 117      | 120                   |           |
| Fig. 5d                                 | N2- Scr. <i>RNAi</i> ,100 $\mu$ M Hyd | 13                     | 16        | +23.07       | <0.0001  | 79                    | 80        |
|                                         |                                       | 14                     | 17        | +21.50       | <0.0001  | 87                    | 84        |
| N2- <i>skn-1 RNAi</i> , 100 $\mu$ M Hyd | 10                                    | 09                     | -10.00    | 0.0199       | 89       | 84                    |           |
|                                         | 12                                    | 12                     | -         | 0.9684       | 94       | 102                   |           |
| Fig. 5e                                 | EU31, 100 $\mu$ M Hyd                 | 10                     | 10        | -            | 0.3257   | 80                    | 95        |
|                                         |                                       | 11                     | 11        | -            | 0.4184   | 112                   | 108       |
| EU1,100 $\mu$ M Hyd                     | 11                                    | 12                     | +09.09    | 0.0141       | 91       | 105                   |           |
|                                         | 13                                    | 15                     | +16.16    | <0.0001      | 103      | 97                    |           |
| Fig. 5g                                 | DA1113,100 $\mu$ M Hyd                | 22                     | 21        | -04.54       | 0.4118   | 70                    | 67        |
|                                         |                                       | 24                     | 24        | -            | 0.2646   | 82                    | 83        |
| Suppl. Fig. 5c                          | LG357,100 $\mu$ M Hyd                 | 13                     | 13        | -            | 0.3820   | 90                    | 95        |
|                                         |                                       | 11                     | 11        | -            | 0.3628   | 108                   | 115       |
|                                         |                                       | 12                     | 13        | +08.33       | 0.1946   | 94                    | 93        |
| LG348,100 $\mu$ M Hyd                   | 14                                    | 16                     | +14.28    | <0.0001      | 108      | 101                   |           |
|                                         | 12                                    | 13                     | +08.33    | 0.0868       | 68       | 69                    |           |
|                                         | 11                                    | 12                     | +09.09    | 0.0304       | 77       | 75                    |           |
| Suppl. Fig. 5e                          | CF1038,100 $\mu$ M Hyd                | 10                     | 12        | +20.00       | <0.0001  | 56                    | 60        |
|                                         |                                       | 11                     | 13        | +18.18       | <0.0001  | 64                    | 64        |
| Fig. 6d                                 | BR6516, 100 $\mu$ M Hyd               | 13                     | 17        | +30.76       | <0.0006  | 64                    | 60        |
|                                         |                                       | 08                     | 11        | +37.50       | <0.0001  | 106                   | 105       |
|                                         |                                       | 10                     | 13        | +30.00       | <0.0001  | 71                    | 75        |
| 11                                      | 13                                    | +18.00                 | <0.0001   | 114          | 112      |                       |           |
